# Supplementary material
Source: PubMed Central journal article supplement (PMC3130195)
Supplement: NIHMS208224-supplement-MOESM1.pdf [file NIHMS208224-supplement-MOESM1.pdf]

## Electronic supplementary material

**ESM Table 1** Apoptotic genes induced by TNF- $\alpha$  and inhibited by *FOXO1* siRNA: genes defined in the cell-cycle pathway gene set

| Gene                                       | TNF- $\alpha$ |      | <i>FOXO1</i> siRNA |      |
|--------------------------------------------|---------------|------|--------------------|------|
|                                            | Median        | Mean | Median             | Mean |
| <i>CDKN2B</i>                              | 2.33          | 3.97 | 0.10               | 0.08 |
| <i>CDK66</i>                               | 2.06          | 2.16 | 0.26               | 0.41 |
| <i>CCND3</i>                               | 1.69          | 1.42 | 0.64               | 0.57 |
| <i>RBI</i>                                 | 1.68          | 1.44 | 0.47               | 0.70 |
| <i>CDKN2D</i>                              | 1.64          | 1.56 | 0.39               | 0.65 |
| <i>CDK2</i>                                | 1.57          | 1.22 | 0.24               | 0.44 |
| <i>CCNH</i>                                | 1.53          | 1.40 | 0.87               | 0.76 |
| <i>CDKN2A</i>                              | 1.47          | 1.54 | 0.54               | 0.71 |
| <i>CCNE1</i>                               | 1.34          | 1.23 | 1.01               | 0.83 |
| <i>CDC25A</i>                              | 1.28          | 1.15 | 0.46               | 0.55 |
| <i>CDKN1A</i>                              | 1.28          | 1.20 | 0.84               | 0.69 |
| <i>CDK7</i>                                | 1.24          | 1.33 | 0.62               | 0.60 |
| <i>CDKN1B</i>                              | 1.18          | 1.23 | 0.65               | 0.62 |
| <i>TFDPI</i>                               | 1.16          | 1.21 | 0.54               | 0.80 |
| <i>CCNA1</i>                               | 1.14          | 1.10 | 0.95               | 0.85 |
| <i>CCNB1</i>                               | 1.11          | 1.48 | 0.50               | 0.57 |
| <i>CCND1</i>                               | 1.05          | 0.97 | 0.71               | 0.55 |
| <i>E2F1</i>                                | 0.97          | 0.88 | 0.65               | 0.70 |
| <i>CCND2</i>                               | 0.89          | 1.07 | 0.79               | 0.68 |
| <i>CDKN2C</i>                              | 0.85          | 0.83 | 0.81               | 1.22 |
| <i>RBL1</i>                                | 0.79          | 1.94 | 0.83               | 0.73 |
| <i>CDK4</i>                                | 0.73          | 0.72 | 1.26               | 1.33 |
| <i>CDC2</i> (also known as <i>CDC28A</i> ) | 0.59          | 1.08 | 0.48               | 0.52 |

Fibroblasts were stimulated with TNF- $\alpha$  with or without prior transfection with *FOXO1* or scrambled siRNA and mRNA profiling was carried out. The mean and median values for TNF- $\alpha$  vs unstimulated and *FOXO1* siRNA plus TNF- $\alpha$  vs scrambled siRNA plus TNF- $\alpha$  are shown for triplicate experiments
