# Supplementary material
Source: PubMed Central journal article supplement (PMC3130195)
Supplement: NIHMS208224-supplement-MOESM2.pdf [file NIHMS208224-supplement-MOESM2.pdf]

## Electronic supplementary material

**ESM Table 2** Apoptotic genes induced by TNF- $\alpha$  and inhibited by *FOXO1* siRNA: genes defined in the Akt pathway gene set

| Gene                                                               | TNF- $\alpha$ |      | <i>FOXO1</i> siRNA |      |
|--------------------------------------------------------------------|---------------|------|--------------------|------|
|                                                                    | Median        | Mean | Median             | Mean |
| <i>NFKB1A</i>                                                      | 4.31          | 6.14 | 0.10               | 0.28 |
| <i>NFKB1</i>                                                       | 3.27          | 4.19 | 0.16               | 0.35 |
| <i>RELA</i>                                                        | 2.56          | 2.36 | 0.32               | 0.25 |
| <i>FOXO3</i>                                                       | 2.23          | 2.17 | 0.23               | 0.39 |
| <i>CASP9</i>                                                       | 1.56          | 1.28 | 0.96               | 0.82 |
| <i>PIK3CA</i>                                                      | 1.38          | 1.04 | 0.78               | 0.77 |
| <i>PPP2C-<math>\alpha</math></i> (also known as<br><i>PPP2CA</i> ) | 1.36          | 1.16 | 0.78               | 0.70 |
| <i>FOXO1</i>                                                       | 1.30          | 1.16 | 0.46               | 0.42 |
| <i>HSPC</i> (also known as<br><i>PSMA7</i> )                       | 1.29          | 1.18 | 0.92               | 0.87 |
| <i>CHUK</i>                                                        | 1.25          | 1.19 | 0.81               | 0.78 |
| <i>BAD</i>                                                         | 1.13          | 1.3  | 0.52               | 0.64 |
| <i>GHI</i>                                                         | 1.09          | 1.02 | 1.11               | 0.98 |
| <i>PDPK1</i>                                                       | 1.07          | 1.04 | 0.72               | 1.03 |
| <i>AKT1</i>                                                        | 0.99          | 1.01 | 1.01               | 1.15 |
| <i>MLLT7</i> (also known as<br><i>FOXO4</i> )                      | 0.95          | 0.81 | 1.02               | 1.54 |
| <i>PIK3R1</i>                                                      | 0.88          | 0.97 | 0.47               | 0.58 |
| <i>YWHAH</i>                                                       | 0.82          | 0.92 | 1.39               | 1.25 |
| <i>GHR</i>                                                         | 0.43          | 0.46 | 0.36               | 0.66 |

See footnote for ESM Table 1 for details
