# Supplementary material
Source: PubMed Central journal article supplement (PMC3130195)
Supplement: NIHMS208224-supplement-MOESM3.pdf [file NIHMS208224-supplement-MOESM3.pdf]

## Electronic supplementary material

**ESM Table 3** Apoptotic genes induced by TNF- $\alpha$  and inhibited by *FOXO1* siRNA: genes defined in the p53 pathway gene set

| Gene            | TNF- $\alpha$ |      | <i>FOXO1</i> siRNA |      |
|-----------------|---------------|------|--------------------|------|
|                 | Median        | Mean | Median             | Mean |
| <i>GADD-45A</i> | 2.66          | 3.91 | 0.17               | 0.39 |
| <i>RBI</i>      | 1.68          | 1.44 | 0.47               | 0.70 |
| <i>MDM2</i>     | 1.65          | 1.54 | 0.41               | 0.33 |
| <i>CDK2</i>     | 1.57          | 1.22 | 0.24               | 0.44 |
| <i>CCNE1</i>    | 1.34          | 1.23 | 1.01               | 0.83 |
| <i>CDKN1A</i>   | 1.28          | 1.20 | 0.84               | 0.69 |
| <i>ATM</i>      | 1.19          | 1.29 | 0.77               | 0.77 |
| <i>BCL2</i>     | 1.08          | 2.70 | 0.31               | 0.42 |
| <i>CCND1</i>    | 1.05          | 0.97 | 0.71               | 0.55 |
| <i>PCNA</i>     | 1.04          | 0.85 | 0.67               | 0.71 |
| <i>APAF1</i>    | 0.99          | 1.01 | 0.67               | 0.71 |
| <i>E2F1</i>     | 0.97          | 0.88 | 0.79               | 0.67 |
| <i>TP53</i>     | 0.95          | 1.01 | 0.58               | 0.87 |
| <i>TIMP3</i>    | 0.86          | 0.73 | 0.63               | 0.68 |
| <i>BAX</i>      | 0.85          | 0.83 | 0.69               | 0.71 |
| <i>CDK44</i>    | 0.73          | 0.72 | 1.26               | 1.33 |

See footnote for ESM Table 1 for details
