# Supplementary material
Source: PubMed Central journal article supplement (PMC3130195)
Supplement: NIHMS208224-supplement-MOESM4.pdf [file NIHMS208224-supplement-MOESM4.pdf]

## Electronic supplementary material

**ESM Table 4** Apoptotic genes induced by TNF- $\alpha$  and inhibited by *FOXO1* siRNA: genes defined in the mitochondrial apoptotic pathway gene set

| Gene                                                   | TNF- $\alpha$ |       | <i>FOXO1</i> siRNA |      |
|--------------------------------------------------------|---------------|-------|--------------------|------|
|                                                        | Median        | Mean  | Median             | Mean |
| <i>BIRC3</i>                                           | 17.73         | 18.69 | 0.03               | 0.40 |
| <i>CASP7</i>                                           | 2.51          | 1.99  | 0.44               | 0.43 |
| <i>BID</i>                                             | 2.48          | 2.28  | 0.50               | 0.39 |
| <i>BIRC2</i>                                           | 1.99          | 2.22  | 0.37               | 0.48 |
| <i>CASP3</i>                                           | 1.95          | 1.66  | 0.67               | 0.68 |
| <i>CYCS</i>                                            | 1.63          | 1.63  | 0.44               | 0.53 |
| <i>CASP9</i>                                           | 1.56          | 1.28  | 0.96               | 0.82 |
| <i>PDCD8</i> (alias<br>also known as<br><i>AIFM1</i> ) | 1.55          | 2.00  | 0.66               | 0.63 |
| <i>BCL2L1</i>                                          | 1.50          | 1.52  | 0.26               | 0.33 |
| <i>BIRC4</i>                                           | 1.36          | 1.36  | 0.52               | 0.40 |
| <i>BAK1</i>                                            | 1.34          | 1.24  | 1.10               | 0.88 |
| <i>CASP8</i>                                           | 1.29          | 1.04  | 0.15               | 0.50 |
| <i>DIABLO</i>                                          | 1.15          | 1.29  | 0.72               | 0.62 |
| <i>BCL2</i>                                            | 1.08          | 2.70  | 0.31               | 0.42 |
| <i>DDFA</i>                                            | 1.02          | 0.91  | 0.96               | 1.13 |
| <i>APAF1</i>                                           | 0.99          | 1.01  | 0.67               | 0.71 |
| <i>CASP6</i>                                           | 0.97          | 0.79  | 0.77               | 1.41 |
| <i>BAX</i>                                             | 0.85          | 0.83  | 0.33               | 0.71 |
| <i>DDFB</i>                                            | 0.79          | 0.75  | 1.53               | 1.61 |
| <i>ENDOG</i>                                           | 0.73          | 0.77  | 1.44               | 1.34 |

See footnote for ESM Table 1 for details
