# Supplementary material
Source: PubMed Central journal article supplement (PMC3130195)
Supplement: NIHMS208224-supplement-MOESM5.pdf [file NIHMS208224-supplement-MOESM5.pdf]

## Electronic supplementary material

**ESM Table 5** Inflammatory genes induced by TNF- $\alpha$  and inhibited by *FOXO1* siRNA: genes defined in the cytokine pathway gene sets

| Gene                                                      | TNF- $\alpha$ |        | <i>FOXO1</i> siRNA |      |
|-----------------------------------------------------------|---------------|--------|--------------------|------|
|                                                           | Median        | Mean   | Median             | Mean |
| <i>IL8</i>                                                | 294.75        | 298.69 | 0.01               | 0.26 |
| <i>IL6</i>                                                | 14.52         | 13.53  | 0.04               | 0.39 |
| <i>IL1A</i>                                               | 10.83         | 66.63  | 0.01               | 0.17 |
| <i>IL15</i>                                               | 3.60          | 3.32   | 0.16               | 0.20 |
| <i>IL4</i>                                                | 2.18          | 2.07   | 1.23               | 0.90 |
| <i>TNF-<math>\alpha</math></i>                            | 2.18          | 7.84   | 0.02               | 0.30 |
| <i>IL12A</i>                                              | 2.07          | 1.56   | 0.36               | 0.35 |
| <i>IL18</i>                                               | 1.74          | 1.88   | 0.15               | 0.16 |
| <i>IL16</i>                                               | 1.55          | 1.32   | 0.68               | 0.71 |
| <i>IFNB1</i>                                              | 1.54          | 1.57   | 0.02               | 0.04 |
| <i>IL10</i>                                               | 1.31          | 1.31   | 1.00               | 0.86 |
| <i>IL2</i>                                                | 1.24          | 1.60   | 1.02               | 0.90 |
| <i>LT-<math>\alpha</math></i> (also known as <i>LTA</i> ) | 1.19          | 2.95   | 1.06               | 0.77 |
| <i>IL13</i>                                               | 1.11          | 1.01   | 0.68               | 0.74 |
| <i>IFNA1</i>                                              | 1.08          | 1.15   | 0.83               | 0.83 |
| <i>IL9</i>                                                | 1.04          | 1.16   | 1.04               | 1.08 |
| <i>IL3</i>                                                | 1.04          | 1.14   | 0.48               | 1.06 |
| <i>IFNG</i>                                               | 0.82          | 0.97   | 0.94               | 0.87 |
| <i>IL5</i>                                                | 0.80          | 0.86   | 0.90               | 0.84 |
| <i>IL12B</i>                                              | 0.74          | 0.80   | 1.23               | 0.98 |
| <i>IL17</i> (also known as <i>IL17A</i> )                 | 0.71          | 1.30   | 0.65               | 0.68 |

See footnote for ESM Table 1 for details
