# Supplementary material
Source: PubMed Central journal article supplement (PMC3130195)
Supplement: NIHMS208224-supplement-MOESM6.pdf [file NIHMS208224-supplement-MOESM6.pdf]

**Electronic supplementary material**

**ESM Table 6** Inflammatory genes induced by TNF- $\alpha$  and inhibited by *FOXO1* siRNA: genes defined in the NF $\kappa$ B pathway gene set

| <b>Gene</b>                    | <b>TNF-<math>\alpha</math></b> |             | <b><i>FOXO1</i> siRNA</b> |             |
|--------------------------------|--------------------------------|-------------|---------------------------|-------------|
|                                | <b>Median</b>                  | <b>Mean</b> | <b>Median</b>             | <b>Mean</b> |
| <i>TNFAIP3</i>                 | 18.77                          | 28.47       | 0.01                      | 0.28        |
| <i>IL1A</i>                    | 10.83                          | 66.63       | 0.01                      | 0.17        |
| <i>NFKBIA</i>                  | 4.31                           | 6.14        | 0.10                      | 0.28        |
| <i>MYD88</i>                   | 3.34                           | 2.49        | 0.34                      | 0.35        |
| <i>NFKB1</i>                   | 3.27                           | 4.19        | 0.16                      | 0.35        |
| <i>RELA</i>                    | 2.56                           | 2.36        | 0.32                      | 0.25        |
| <i>TNFRSF1B</i>                | 2.32                           | 2.20        | 0.52                      | 0.58        |
| <i>TNF-<math>\alpha</math></i> | 2.18                           | 7.84        | 0.02                      | 0.30        |
| <i>MAP3K14</i>                 | 1.97                           | 2.08        | 0.34                      | 0.50        |
| <i>TRADD</i>                   | 1.80                           | 1.47        | 0.59                      | 0.52        |
| <i>TRAF6</i>                   | 1.68                           | 1.63        | 0.43                      | 0.35        |
| <i>TNFRSF1A</i>                | 1.58                           | 1.37        | 0.81                      | 0.68        |
| <i>IKBKB</i>                   | 1.43                           | 1.28        | 0.25                      | 0.37        |
| <i>RIPK1</i>                   | 1.42                           | 1.34        | 0.41                      | 0.51        |
| <i>MAP3K7IP1</i>               | 1.34                           | 1.43        | 0.59                      | 0.67        |
| <i>IRAK1</i>                   | 1.30                           | 1.21        | 0.44                      | 0.53        |
| <i>IKBKG</i>                   | 1.30                           | 1.31        | 0.80                      | 0.72        |
| <i>CHUK</i>                    | 1.25                           | 1.19        | 0.81                      | 0.78        |
| <i>TLR4</i>                    | 1.09                           | 1.48        | 0.23                      | 0.39        |
| <i>MAP3K7</i>                  | 0.99                           | 0.92        | 0.69                      | 0.88        |
| <i>FADD</i>                    | 0.98                           | 0.84        | 0.99                      | 1.11        |
| <i>IL1R1</i>                   | 0.88                           | 1.13        | 0.70                      | 0.73        |
| <i>MAP3K1</i>                  | 0.72                           | 1.06        | 0.65                      | 0.47        |

See footnote for ESM Table 1 for details
