# Supplementary material
Source: PubMed Central journal article supplement (PMC3130195)
Supplement: NIHMS208224-supplement-MOESM7.pdf [file NIHMS208224-supplement-MOESM7.pdf]

## Electronic supplementary material

**ESM Table 7** Inflammatory genes induced by TNF- $\alpha$  and inhibited by *FOXO1* siRNA: genes defined in the Toll pathway gene set

| Gene                                                          | TNF- $\alpha$ |      | <i>FOXO1</i> siRNA |      |
|---------------------------------------------------------------|---------------|------|--------------------|------|
|                                                               | Median        | Mean | Median             | Mean |
| <i>TLR2</i>                                                   | 8.37          | 6.01 | 0.34               | 0.32 |
| <i>FOS</i>                                                    | 5.79          | 5.48 | 0.08               | 0.44 |
| <i>TLR3</i>                                                   | 4.51          | 3.31 | 0.17               | 0.14 |
| <i>NFKB1A</i>                                                 | 4.31          | 6.14 | 0.10               | 0.28 |
| <i>MYD88</i>                                                  | 3.34          | 2.49 | 0.34               | 0.35 |
| <i>NFKB1</i>                                                  | 3.27          | 4.19 | 0.16               | 0.35 |
| <i>RELA</i>                                                   | 2.56          | 2.36 | 0.32               | 0.25 |
| <i>MAP2K3</i>                                                 | 2.14          | 2.34 | 0.54               | 0.59 |
| <i>MAP3K14</i>                                                | 1.97          | 2.08 | 0.34               | 0.50 |
| <i>MAP3K7IP2</i>                                              | 1.93          | 1.89 | 0.25               | 0.31 |
| <i>JUN</i>                                                    | 1.93          | 4.63 | 0.11               | 0.08 |
| <i>TRAF6</i>                                                  | 1.68          | 1.63 | 0.43               | 0.35 |
| <i>ELK1</i>                                                   | 1.55          | 1.30 | 0.54               | 0.78 |
| <i>TLR10</i>                                                  | 1.52          | 1.33 | 0.91               | 0.77 |
| <i>TLR4</i>                                                   | 1.49          | 1.34 | 0.23               | 0.39 |
| <i>TIRAP</i>                                                  | 1.47          | 1.22 | 0.48               | 0.66 |
| <i>IKBKB</i>                                                  | 1.43          | 1.28 | 0.25               | 0.37 |
| <i>MAPK8</i>                                                  | 1.42          | 1.10 | 0.76               | 0.69 |
| <i>MAP3K7IP1</i>                                              | 1.35          | 1.11 | 0.59               | 0.67 |
| <i>IKBKG</i>                                                  | 1.30          | 1.31 | 0.80               | 0.72 |
| <i>IRAK1</i>                                                  | 1.30          | 1.21 | 0.44               | 0.53 |
| <i>CHUK</i>                                                   | 1.25          | 1.19 | 0.81               | 0.78 |
| <i>MAPK14</i>                                                 | 1.23          | 0.98 | 0.44               | 1.23 |
| <i>PPAR-<math>\alpha</math></i> (also known as <i>PPARA</i> ) | 1.21          | 0.97 | 0.54               | 0.80 |
| <i>TLR6</i>                                                   | 1.19          | 1.05 | 0.85               | 0.80 |
| <i>MAP3K1</i>                                                 | 1.14          | 0.93 | 0.65               | 0.47 |
| <i>MAP2K4</i>                                                 | 1.02          | 0.99 | 0.70               | 0.82 |
| <i>MAP3K7</i>                                                 | 0.99          | 0.92 | 0.69               | 0.88 |
| <i>TLR7</i>                                                   | 0.95          | 0.93 | 0.89               | 0.77 |
| <i>TLR9</i>                                                   | 0.94          | 1.11 | 0.83               | 0.83 |
| <i>LY96</i>                                                   | 0.92          | 0.84 | 1.44               | 1.27 |
| <i>TOLLIP</i>                                                 | 0.86          | 0.86 | 0.66               | 0.94 |
| <i>CD14</i>                                                   | 0.80          | 0.65 | 0.56               | 0.79 |
| <i>SITPEC</i> (also known as <i>ECSIT</i> )                   | 0.69          | 0.71 | 1.22               | 0.88 |
| <i>MAP2K6</i>                                                 | 0.63          | 0.68 | 0.74               | 0.89 |

See footnote for ESM Table 1 for details
