# Supplementary material
Source: PubMed Central journal article supplement (PMC3130195)
Supplement: NIHMS208224-supplement-MOESM9.pdf [file NIHMS208224-supplement-MOESM9.pdf]

Electronic supplementary material  
ESM Fig. 2

**a**

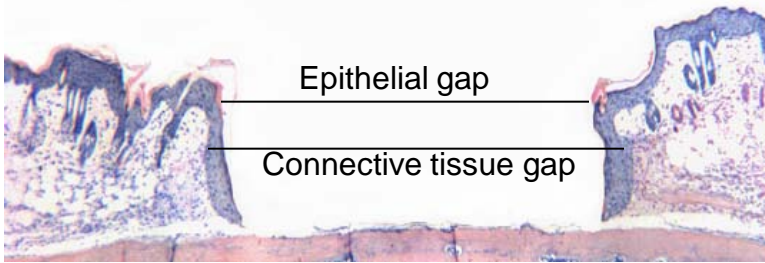

5 days: Control

**b**

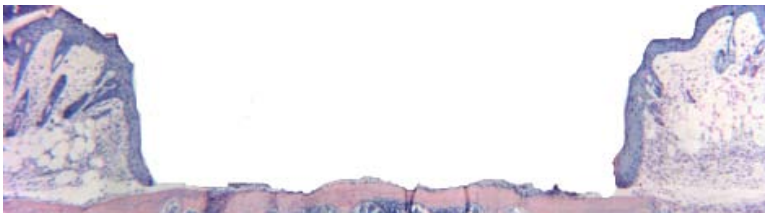

5 days: Diabetes

**c**

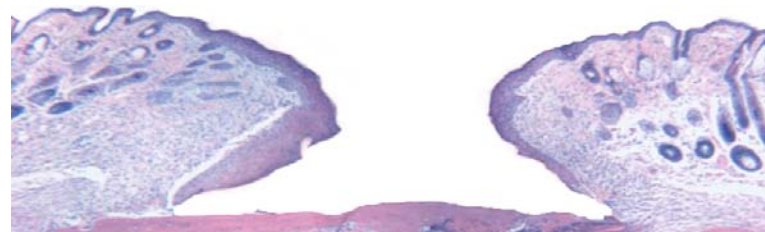

9 days: Control

**d**

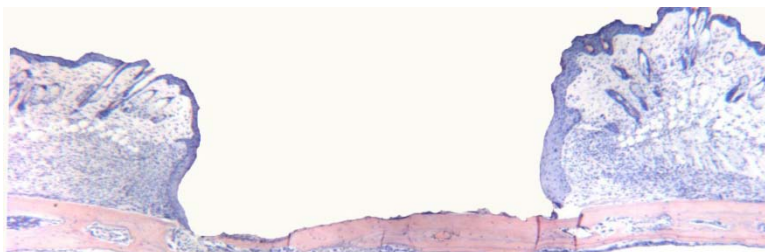

9 days: Diabetes
