# Supplementary material
Source: PubMed Central journal article supplement (PMC3130195)

Electronic supplementary material

ESM Fig. 1

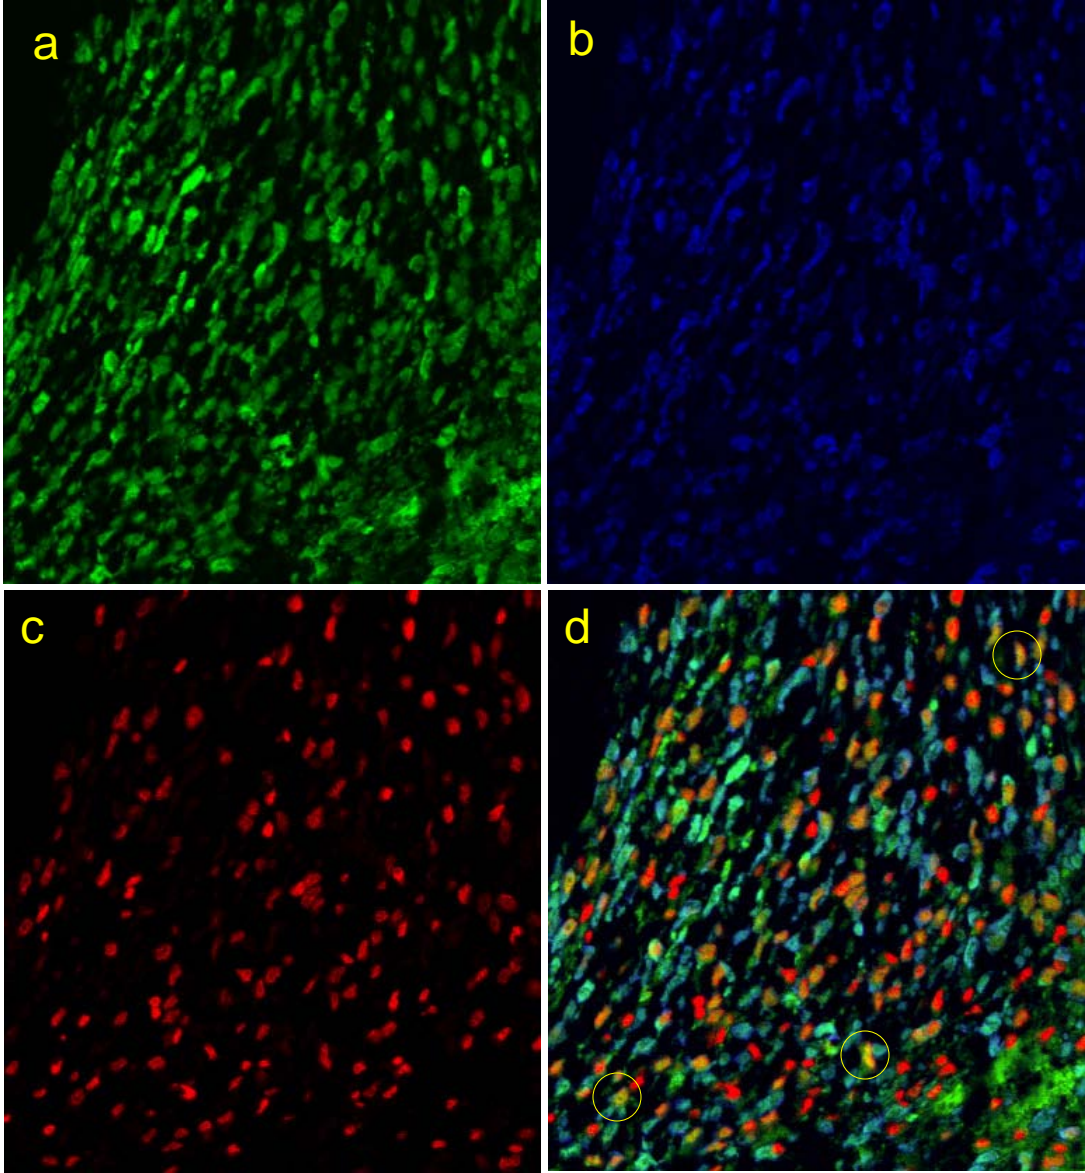

Supplement: NIHMS208224-supplement-MOESM8.pdf [file NIHMS208224-supplement-MOESM8.pdf]

Electronic supplementary material  
ESM Fig. 3

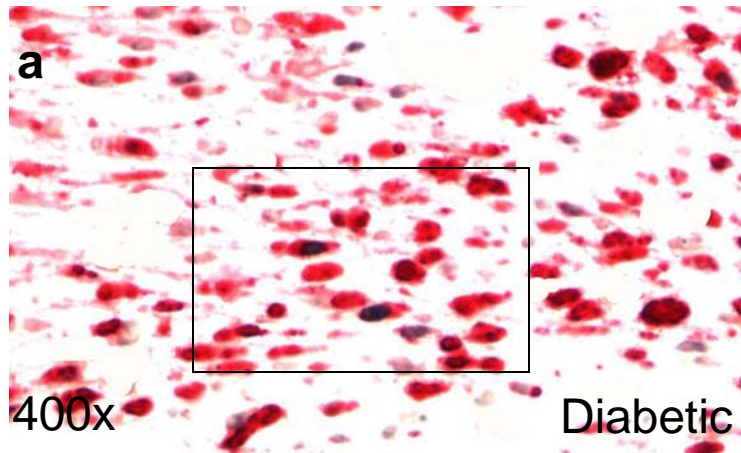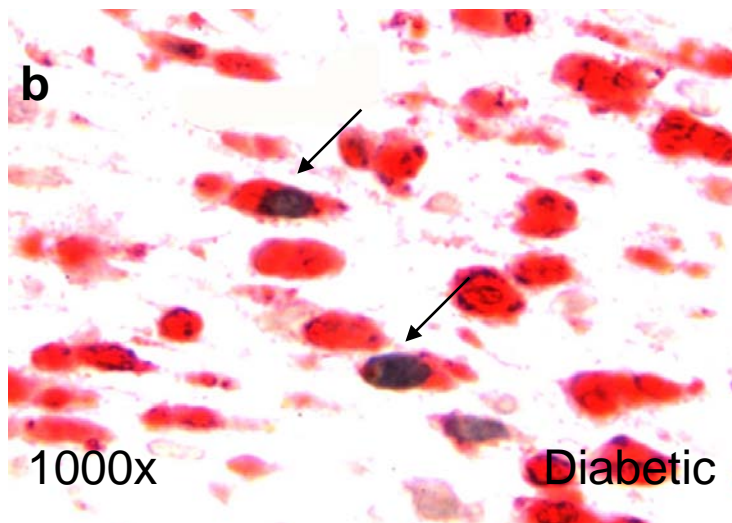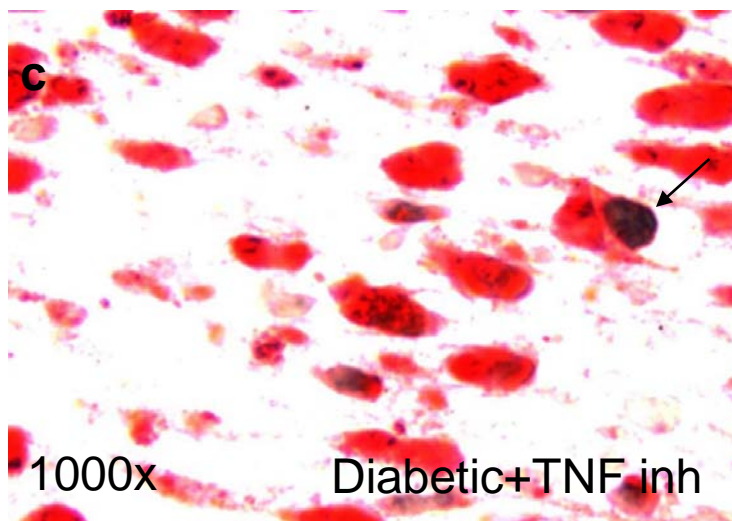

Supplement: NIHMS208224-supplement-MOESMN10.pdf [file NIHMS208224-supplement-MOESMN10.pdf]

Electronic supplementary material

ESM Fig. 4

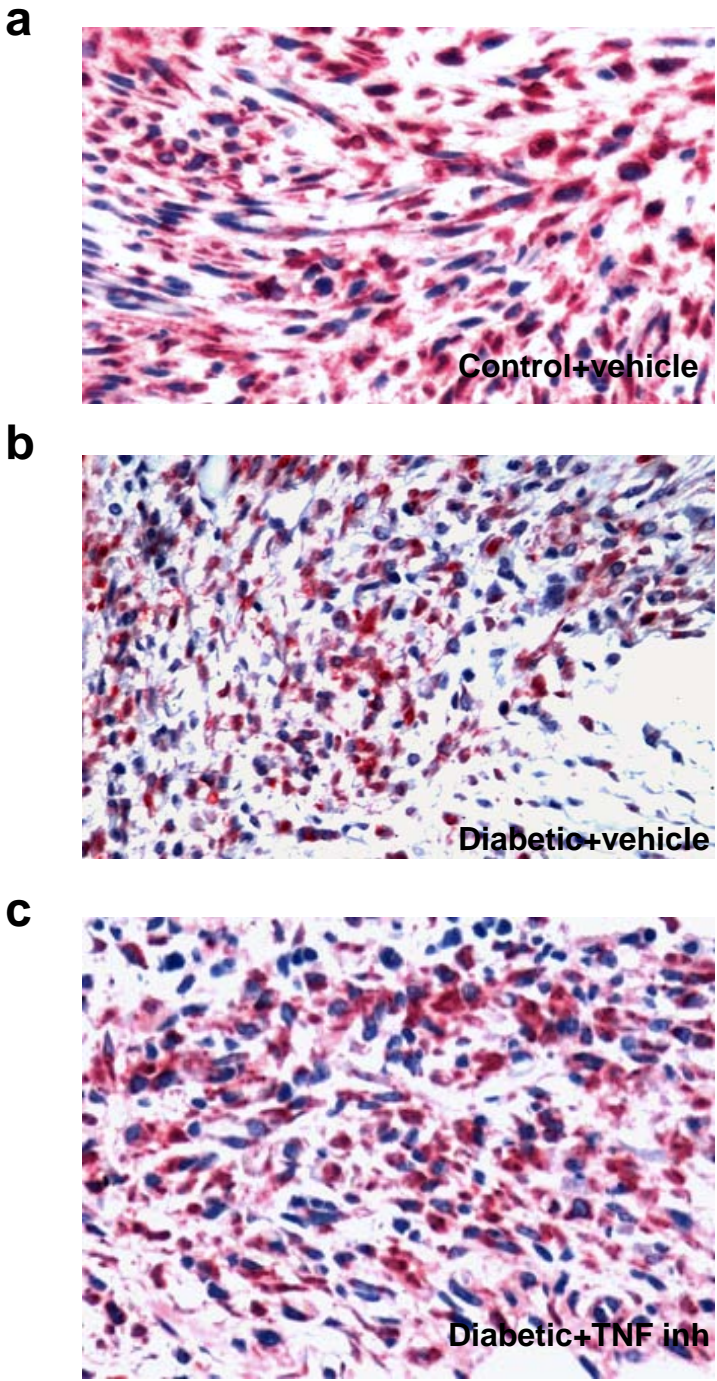

Supplement: NIHMS208224-supplement-MOESMN11.pdf [file NIHMS208224-supplement-MOESMN11.pdf]

**a**

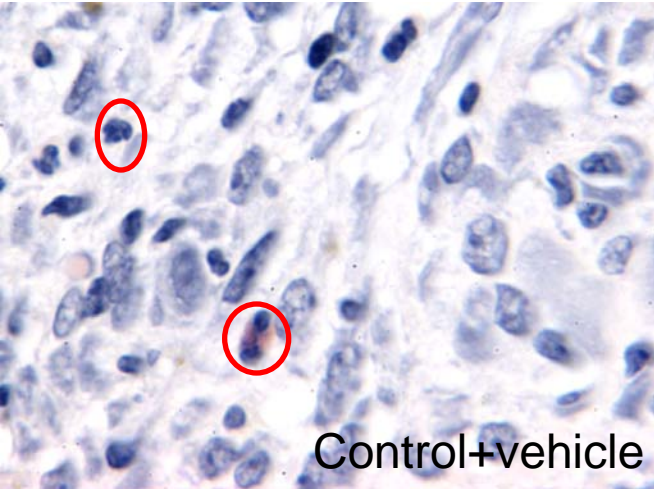

**b**

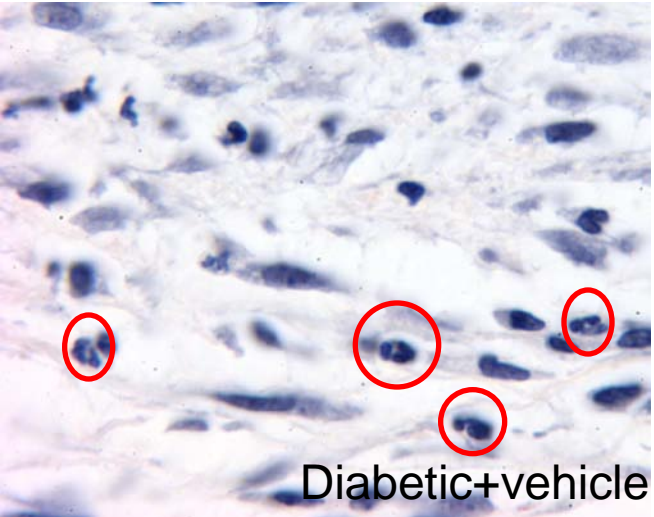

**c**

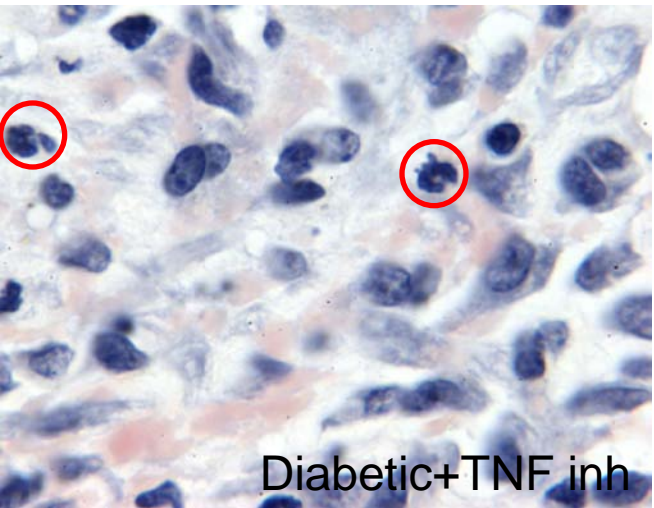

Supplement: NIHMS208224-supplement-MOESMN12.pdf [file NIHMS208224-supplement-MOESMN12.pdf]
